# Supplementary material for: HIV-1 Protease, Reverse Transcriptase, and Integrase Variation
Source: PubMed Central journal article supplement (PMC4907232; doi:10.1128/jvi.00495-16), 2016-06-10
Supplement: JVI.00495-16_zjv999181745so1.pdf [file JVI.00495-16_zjv999181745so1.pdf]

Supplementary Table 1. List of Mutations Indicative of APOBEC-Mediated G-to-A Editing

| Gene | Position | WT | NA  | Target Codon Position | APOBEC | Signature APOBEC Mutation | No. Plasma Samples |
|------|----------|----|-----|-----------------------|--------|---------------------------|--------------------|
| PR   | 6        | W  | TGG | 2                     | 3G     | *                         | 5                  |
| PR   | 17       | G  | GG- | 1                     | 3F, 3G | K                         | 0                  |
| PR   | 21       | E  | GA- | 1                     | 3F     | N                         | 6                  |
| PR   | 25       | D  | GA- | 1                     | 3F     | K                         | 4                  |
| PR   | 25       | D  | GA- | 1                     | 3F     | N                         | 29                 |
| PR   | 27       | G  | GG- | 1                     | 3F, 3G | E                         | 8                  |
| PR   | 27       | G  | GG- | 1                     | 3F, 3G | K                         | 0                  |
| PR   | 27       | G  | GG- | 1                     | 3G     | R                         | 7                  |
| PR   | 27       | G  | GG- | 1                     | 3G     | S                         | 1                  |
| PR   | 29       | D  | GAT | 1                     | 3F     | K                         | 0                  |
| PR   | 29       | D  | GAT | 1                     | 3F     | N                         | 22                 |
| PR   | 30       | D  | GA- | 1                     | 3F     | K                         | 0                  |
| PR   | 40       | G  | GG- | 1                     | 3F, 3G | E                         | 22                 |
| PR   | 40       | G  | GG- | 1                     | 3G     | R                         | 17                 |
| PR   | 40       | G  | GG- | 1                     | 3G     | S                         | 0                  |
| PR   | 42       | W  | TGG | 2, 3                  | 3F, 3G | *                         | 13                 |
| PR   | 48       | G  | GG- | 1                     | 3F, 3G | E                         | 29                 |
| PR   | 48       | G  | GG- | 1                     | 3F, 3G | K                         | 2                  |
| PR   | 48       | G  | GG- | 1                     | 3G     | R                         | 19                 |
| PR   | 49       | G  | GGA | 1, 2                  | 3F     | E                         | 27                 |
| PR   | 49       | G  | GGA | 1, 2                  | 3F     | K                         | 2                  |
| PR   | 49       | G  | GGA | 1                     | 3G     | R                         | 11                 |
| PR   | 51       | G  | GG- | 1                     | 3F, 3G | E                         | 16                 |
| PR   | 51       | G  | GG- | 1                     | 3F, 3G | K                         | 8                  |
| PR   | 51       | G  | GG- | 1                     | 3G     | R                         | 14                 |
| PR   | 51       | G  | GG- | 1                     | 3G     | S                         | 0                  |
| PR   | 52       | G  | GG- | 1                     | 3F, 3G | E                         | 4                  |
| PR   | 52       | G  | GG- | 1                     | 3F, 3G | K                         | 1                  |
| PR   | 52       | G  | GG- | 1                     | 3G     | R                         | 6                  |
| PR   | 52       | G  | GG- | 1                     | 3G     | S                         | 8                  |
| PR   | 68       | G  | GG- | 1                     | 3F, 3G | K                         | 2                  |
| PR   | 68       | G  | GG- | 1                     | 3G     | R                         | 13                 |
| PR   | 68       | G  | GG- | 1                     | 3G     | S                         | 0                  |
| PR   | 78       | G  | GG- | 1                     | 3F, 3G | E                         | 8                  |
| PR   | 78       | G  | GG- | 1                     | 3F, 3G | K                         | 1                  |
| PR   | 78       | G  | GG- | 1                     | 3G     | R                         | 24                 |
| PR   | 86       | G  | GG- | 1                     | 3F, 3G | E                         | 17                 |
| PR   | 86       | G  | GG- | 1                     | 3F, 3G | K                         | 4                  |
| PR   | 86       | G  | GG- | 1                     | 3G     | R                         | 26                 |
| PR   | 86       | G  | GG- | 1                     | 3G     | S                         | 0                  |
| PR   | 94       | G  | GG- | 1                     | 3F, 3G | K                         | 0                  |
| PR   | 94       | G  | GG- | 1                     | 3G     | R                         | 6                  |
| PR   | 94       | G  | GG- | 1                     | 3G     | S                         | 13                 |
| RT   | 15       | G  | GG- | 1                     | 3F, 3G | K                         | 7                  |
| RT   | 15       | G  | GG- | 1                     | 3G     | R                         | 30                 |

|    |     |   |     |      |        |   |    |
|----|-----|---|-----|------|--------|---|----|
| RT | 15  | G | GG- | 1    | 3G     | S | 0  |
| RT | 16  | M | ATG | 3    | 3G     | I | 25 |
| RT | 17  | D | GAT | 1    | 3F     | N | 24 |
| RT | 18  | G | GG- | 1    | 3F, 3G | K | 0  |
| RT | 18  | G | GG- | 1    | 3G     | R | 8  |
| RT | 18  | G | GG- | 1    | 3G     | S | 2  |
| RT | 24  | W | TGG | 2    | 3G     | * | 9  |
| RT | 41  | M | -TG | 3    | 3G     | I | 34 |
| RT | 42  | E | GA- | 1    | 3F     | K | 67 |
| RT | 42  | E | GA- | 1    | 3F     | N | 0  |
| RT | 45  | G | GG- | 1    | 3F, 3G | K | 5  |
| RT | 45  | G | GG- | 1    | 3G     | R | 95 |
| RT | 51  | G | GG- | 1    | 3F, 3G | K | 2  |
| RT | 51  | G | GG- | 1    | 3G     | R | 27 |
| RT | 53  | E | GA- | 1    | 3F     | K | 41 |
| RT | 71  | W | TGG | 2, 3 | 3F, 3G | * | 11 |
| RT | 76  | D | GA- | 1    | 3F     | K | 0  |
| RT | 79  | E | GA- | 1    | 3F     | K | 20 |
| RT | 86  | D | GA- | 1    | 3F     | K | 0  |
| RT | 88  | W | TGG | 2, 3 | 3F, 3G | * | 17 |
| RT | 89  | E | GA- | 1    | 3F     | K | 17 |
| RT | 89  | E | GA- | 1    | 3F     | N | 0  |
| RT | 93  | G | GG- | 1    | 3F, 3G | E | 10 |
| RT | 93  | G | GG- | 1    | 3F, 3G | K | 4  |
| RT | 93  | G | GG- | 1    | 3G     | R | 23 |
| RT | 99  | G | GG- | 1    | 3F, 3G | E | 6  |
| RT | 99  | G | GG- | 1    | 3F, 3G | K | 0  |
| RT | 99  | G | GG- | 1    | 3G     | R | 29 |
| RT | 99  | G | GG- | 1    | 3G     | S | 2  |
| RT | 110 | D | GAT | 1    | 3F     | K | 0  |
| RT | 110 | D | GAT | 1    | 3F     | N | 16 |
| RT | 112 | G | GG- | 1    | 3F, 3G | E | 13 |
| RT | 112 | G | GG- | 1    | 3F, 3G | K | 3  |
| RT | 112 | G | GG- | 1    | 3G     | R | 0  |
| RT | 112 | G | GG- | 1    | 3G     | S | 13 |
| RT | 113 | D | GA- | 1    | 3F     | K | 2  |
| RT | 141 | G | GG- | 1    | 3F, 3G | E | 20 |
| RT | 141 | G | GG- | 1    | 3F, 3G | K | 4  |
| RT | 141 | G | GG- | 1    | 3G     | R | 32 |
| RT | 141 | G | GG- | 1    | 3G     | S | 0  |
| RT | 152 | G | GG- | 1    | 3F, 3G | E | 18 |
| RT | 152 | G | GG- | 1    | 3F, 3G | K | 0  |
| RT | 152 | G | GG- | 1    | 3G     | R | 12 |
| RT | 152 | G | GG- | 1    | 3G     | S | 0  |
| RT | 153 | W | TGG | 2, 3 | 3F, 3G | * | 19 |
| RT | 155 | G | GG- | 1    | 3F, 3G | E | 10 |
| RT | 155 | G | GG- | 1    | 3F, 3G | K | 1  |
| RT | 155 | G | GG- | 1    | 3G     | R | 20 |
| RT | 155 | G | GG- | 1    | 3G     | S | 0  |

|    |     |   |     |      |        |   |    |
|----|-----|---|-----|------|--------|---|----|
| RT | 185 | D | GAT | 1    | 3F     | K | 0  |
| RT | 185 | D | GAT | 1    | 3F     | N | 11 |
| RT | 186 | D | GA- | 1    | 3F     | K | 0  |
| RT | 186 | D | GA- | 1    | 3F     | N | 22 |
| RT | 192 | D | GA- | 1    | 3F     | K | 0  |
| RT | 212 | W | TGG | 2, 3 | 3F, 3G | * | 16 |
| RT | 213 | G | GG- | 1    | 3F, 3G | K | 3  |
| RT | 213 | G | GG- | 1    | 3G     | R | 15 |
| RT | 229 | W | TGG | 2, 3 | 3F, 3G | * | 15 |
| RT | 231 | G | GG- | 1    | 3F, 3G | K | 2  |
| RT | 231 | G | GG- | 1    | 3G     | R | 8  |
| RT | 231 | G | GG- | 1    | 3G     | S | 5  |
| RT | 233 | E | GA- | 1    | 3F     | K | 21 |
| RT | 239 | W | TGG | 2, 3 | 3F, 3G | * | 3  |
| RT | 252 | W | TGG | 2, 3 | 3F, 3G | * | 9  |
| RT | 256 | D | GA- | 1    | 3F     | K | 0  |
| RT | 256 | D | GA- | 1    | 3F     | N | 5  |
| RT | 262 | G | GG- | 1    | 3F, 3G | K | 2  |
| RT | 262 | G | GG- | 1    | 3G     | R | 12 |
| RT | 262 | G | GG- | 1    | 3G     | S | 0  |
| RT | 266 | W | TGG | 2, 3 | 3F, 3G | * | 9  |
| RT | 273 | G | GG- | 1    | 3F, 3G | E | 7  |
| RT | 273 | G | GG- | 1    | 3F, 3G | K | 7  |
| RT | 273 | G | GG- | 1    | 3G     | S | 0  |
| RT | 285 | G | GG- | 1    | 3F, 3G | E | 9  |
| RT | 285 | G | GG- | 1    | 3F, 3G | K | 1  |
| RT | 285 | G | GG- | 1    | 3G     | R | 8  |
| RT | 298 | E | GA- | 1    | 3F     | N | 0  |
| RT | 302 | E | GA- | 1    | 3F     | K | 9  |
| RT | 302 | E | GA- | 1    | 3F     | N | 0  |
| RT | 305 | E | GA- | 1    | 3F     | K | 12 |
| RT | 305 | E | GA- | 1    | 3F     | N | 0  |
| RT | 316 | G | GG- | 1    | 3F, 3G | E | 10 |
| RT | 316 | G | GG- | 1    | 3F, 3G | K | 3  |
| RT | 316 | G | GG- | 1    | 3G     | R | 23 |
| RT | 324 | D | GA- | 1    | 3F     | K | 1  |
| RT | 337 | W | TGG | 2    | 3G     | * | 3  |
| RT | 344 | E | GA- | 1    | 3F     | K | 14 |
| RT | 344 | E | GA- | 1    | 3F     | N | 0  |
| RT | 352 | G | GG- | 1    | 3F, 3G | E | 3  |
| RT | 352 | G | GG- | 1    | 3F, 3G | K | 0  |
| RT | 352 | G | GG- | 1    | 3G     | R | 13 |
| RT | 352 | G | GG- | 1    | 3G     | S | 0  |
| RT | 364 | D | GAT | 1    | 3F     | K | 0  |
| RT | 378 | E | GA- | 1    | 3F     | N | 0  |
| RT | 383 | W | TGG | 2, 3 | 3F, 3G | * | 3  |
| RT | 384 | G | GG- | 1    | 3F, 3G | E | 2  |
| RT | 384 | G | GG- | 1    | 3F, 3G | K | 0  |
| RT | 384 | G | GG- | 1    | 3G     | R | 2  |

|    |     |   |     |      |        |   |    |
|----|-----|---|-----|------|--------|---|----|
| RT | 384 | G | GG- | 1    | 3G     | S | 0  |
| RT | 396 | E | GA- | 1    | 3F     | K | 8  |
| RT | 398 | W | TGG | 2, 3 | 3F, 3G | * | 2  |
| RT | 401 | W | TGG | 2    | 3G     | * | 2  |
| RT | 402 | W | TGG | 2    | 3G     | * | 4  |
| RT | 404 | E | GA- | 1    | 3F     | K | 3  |
| RT | 406 | W | TGG | 2    | 3G     | * | 0  |
| RT | 410 | W | TGG | 2, 3 | 3F, 3G | * | 3  |
| RT | 413 | E | GA- | 1    | 3F     | K | 3  |
| RT | 413 | E | GA- | 1    | 3F     | N | 0  |
| RT | 414 | W | TGG | 2, 3 | 3F, 3G | * | 6  |
| RT | 415 | E | GA- | 1    | 3F     | N | 0  |
| RT | 426 | W | TGG | 2    | 3G     | * | 2  |
| RT | 430 | E | GA- | 1    | 3F     | N | 0  |
| RT | 436 | G | GG- | 1    | 3G     | R | 15 |
| RT | 436 | G | GG- | 1    | 3G     | S | 0  |
| RT | 438 | E | GA- | 1    | 3F     | K | 5  |
| RT | 443 | D | GAT | 1    | 3F     | K | 0  |
| RT | 443 | D | GAT | 1    | 3F     | N | 4  |
| RT | 444 | G | GG- | 1    | 3F, 3G | E | 0  |
| RT | 444 | G | GG- | 1    | 3F, 3G | K | 0  |
| RT | 444 | G | GG- | 1    | 3G     | R | 2  |
| RT | 444 | G | GG- | 1    | 3G     | S | 0  |
| RT | 449 | E | GA- | 1    | 3F     | K | 7  |
| RT | 453 | G | GG- | 1    | 3F, 3G | K | 0  |
| RT | 453 | G | GG- | 1    | 3G     | R | 2  |
| RT | 453 | G | GG- | 1    | 3G     | S | 0  |
| RT | 456 | G | GG- | 1    | 3F, 3G | E | 1  |
| RT | 456 | G | GG- | 1    | 3F, 3G | K | 1  |
| RT | 456 | G | GG- | 1    | 3G     | R | 1  |
| RT | 456 | G | GG- | 1    | 3G     | S | 0  |
| RT | 462 | G | GG- | 1    | 3F, 3G | E | 1  |
| RT | 462 | G | GG- | 1    | 3G     | R | 1  |
| RT | 462 | G | GG- | 1    | 3G     | S | 0  |
| RT | 471 | D | GA- | 1    | 3F     | K | 2  |
| RT | 478 | E | GA- | 1    | 3F     | K | 0  |
| RT | 478 | E | GA- | 1    | 3F     | N | 0  |
| RT | 488 | D | GA- | 1    | 3F     | K | 0  |
| RT | 488 | D | GA- | 1    | 3F     | N | 0  |
| RT | 490 | G | GG- | 1    | 3F, 3G | K | 0  |
| RT | 490 | G | GG- | 1    | 3G     | R | 9  |
| RT | 498 | D | GA- | 1    | 3F     | K | 0  |
| RT | 498 | D | GA- | 1    | 3F     | N | 0  |
| RT | 504 | G | GG- | 1    | 3F, 3G | K | 0  |
| RT | 504 | G | GG- | 1    | 3G     | R | 2  |
| RT | 504 | G | GG- | 1    | 3G     | S | 0  |
| RT | 511 | D | GA- | 1    | 3F     | K | 0  |
| RT | 514 | E | GA- | 1    | 3F     | K | 2  |
| RT | 516 | E | GA- | 1    | 3F     | N | 0  |

|    |     |   |     |      |        |   |    |
|----|-----|---|-----|------|--------|---|----|
| RT | 523 | E | GA- | 1    | 3F     | K | 3  |
| RT | 523 | E | GA- | 1    | 3F     | N | 0  |
| RT | 535 | W | TGG | 2, 3 | 3F, 3G | * | 4  |
| RT | 541 | G | GG- | 1    | 3F, 3G | E | 1  |
| RT | 541 | G | GG- | 1    | 3F, 3G | K | 1  |
| RT | 541 | G | GG- | 1    | 3G     | R | 1  |
| RT | 541 | G | GG- | 1    | 3G     | S | 0  |
| RT | 543 | G | GG- | 1    | 3F, 3G | E | 1  |
| RT | 543 | G | GG- | 1    | 3F, 3G | K | 0  |
| RT | 543 | G | GG- | 1    | 3G     | R | 3  |
| RT | 543 | G | GG- | 1    | 3G     | S | 0  |
| RT | 544 | G | GG- | 1    | 3F, 3G | E | 1  |
| RT | 544 | G | GG- | 1    | 3F, 3G | K | 0  |
| RT | 544 | G | GG- | 1    | 3G     | R | 2  |
| RT | 544 | G | GG- | 1    | 3G     | S | 0  |
| RT | 546 | E | GA- | 1    | 3F     | N | 0  |
| RT | 549 | D | GA- | 1    | 3F     | K | 0  |
| RT | 555 | G | GG- | 1    | 3F, 3G | E | 3  |
| RT | 555 | G | GG- | 1    | 3F, 3G | K | 0  |
| RT | 555 | G | GG- | 1    | 3G     | R | 3  |
| RT | 555 | G | GG- | 1    | 3G     | S | 0  |
| IN | 3   | D | GAT | 1    | 3F     | K | 0  |
| IN | 3   | D | GAT | 1    | 3F     | N | 13 |
| IN | 4   | G | GG- | 1    | 3F, 3G | K | 3  |
| IN | 4   | G | GG- | 1    | 3G     | R | 5  |
| IN | 10  | E | GA- | 1    | 3F     | K | 3  |
| IN | 10  | E | GA- | 1    | 3F     | N | 0  |
| IN | 11  | E | GA- | 1    | 3F     | K | 0  |
| IN | 11  | E | GA- | 1    | 3F     | N | 0  |
| IN | 13  | E | GA- | 1    | 3F     | K | 3  |
| IN | 13  | E | GA- | 1    | 3F     | N | 0  |
| IN | 19  | W | TGG | 2, 3 | 3F, 3G | * | 3  |
| IN | 25  | D | GA- | 1    | 3F     | K | 1  |
| IN | 25  | D | GA- | 1    | 3F     | N | 4  |
| IN | 35  | E | GA- | 1    | 3F     | K | 7  |
| IN | 35  | E | GA- | 1    | 3F     | N | 0  |
| IN | 41  | D | GA- | 1    | 3F     | K | 0  |
| IN | 47  | G | GG- | 1    | 3F, 3G | E | 6  |
| IN | 47  | G | GG- | 1    | 3F, 3G | K | 1  |
| IN | 47  | G | GG- | 1    | 3G     | R | 3  |
| IN | 47  | G | GG- | 1    | 3G     | S | 0  |
| IN | 48  | E | GA- | 1    | 3F     | K | 6  |
| IN | 48  | E | GA- | 1    | 3F     | N | 0  |
| IN | 52  | G | GG- | 1    | 3F, 3G | E | 0  |
| IN | 52  | G | GG- | 1    | 3F, 3G | K | 0  |
| IN | 52  | G | GG- | 1    | 3G     | R | 7  |
| IN | 52  | G | GG- | 1    | 3G     | S | 0  |
| IN | 55  | D | GA- | 1    | 3F     | K | 0  |
| IN | 59  | G | GG- | 1    | 3F, 3G | K | 1  |

|    |     |   |     |         |        |   |    |
|----|-----|---|-----|---------|--------|---|----|
| IN | 59  | G | GG- | 1       | 3G     | R | 9  |
| IN | 59  | G | GG- | 1       | 3G     | S | 0  |
| IN | 61  | W | TGG | 2       | 3G     | * | 0  |
| IN | 64  | D | GA- | 1       | 3F     | K | 0  |
| IN | 64  | D | GA- | 1       | 3F     | N | 5  |
| IN | 69  | E | GA- | 1       | 3F     | K | 7  |
| IN | 69  | E | GA- | 1       | 3F     | N | 0  |
| IN | 70  | G | GG- | 1       | 3F, 3G | K | 3  |
| IN | 70  | G | GG- | 1       | 3G     | R | 9  |
| IN | 70  | G | GG- | 1       | 3G     | S | 2  |
| IN | 82  | G | GG- | 1       | 3F, 3G | E | 1  |
| IN | 82  | G | GG- | 1       | 3F, 3G | K | 0  |
| IN | 82  | G | GG- | 1       | 3G     | R | 6  |
| IN | 82  | G | GG- | 1       | 3G     | S | 2  |
| IN | 85  | E | GA- | 1       | 3F     | K | 0  |
| IN | 85  | E | GA- | 1       | 3F     | N | 0  |
| IN | 87  | E | GA- | 1       | 3F     | K | 3  |
| IN | 87  | E | GA- | 1       | 3F     | N | 0  |
| IN | 92  | E | GA- | 1       | 3F     | K | 2  |
| IN | 94  | G | GG- | 1       | 3F, 3G | E | 0  |
| IN | 94  | G | GG- | 1       | 3F, 3G | K | 0  |
| IN | 94  | G | GG- | 1       | 3G     | R | 2  |
| IN | 94  | G | GG- | 1       | 3G     | S | 0  |
| IN | 96  | E | GA- | 1       | 3F     | K | 2  |
| IN | 106 | G | GG- | 1       | 3F, 3G | E | 3  |
| IN | 106 | G | GG- | 1       | 3F, 3G | K | 0  |
| IN | 106 | G | GG- | 1       | 3G     | R | 6  |
| IN | 108 | W | TGG | 2       | 3G     | * | 2  |
| IN | 116 | D | GA- | 1       | 3F     | K | 0  |
| IN | 116 | D | GA- | 1       | 3F     | N | 1  |
| IN | 118 | G | GG- | 1       | 3F, 3G | E | 0  |
| IN | 118 | G | GG- | 1       | 3F, 3G | K | 0  |
| IN | 118 | G | GG- | 1       | 3G     | S | 1  |
| IN | 131 | W | TGG | 2       | 3G     | * | 3  |
| IN | 132 | W | TGG | 2, 3    | 3F, 3G | * | 3  |
| IN | 149 | G | GG- | 1       | 3F, 3G | E | 3  |
| IN | 149 | G | GG- | 1       | 3F, 3G | K | 0  |
| IN | 149 | G | GG- | 1       | 3G     | R | 3  |
| IN | 149 | G | GG- | 1       | 3G     | S | 1  |
| IN | 152 | E | GA- | 1       | 3F     | K | 13 |
| IN | 152 | E | GA- | 1       | 3F     | N | 0  |
| IN | 167 | D | GA- | 1       | 3F     | K | 1  |
| IN | 167 | D | GA- | 1       | 3F     | N | 2  |
| IN | 170 | E | GA- | 1       | 3F     | K | 5  |
| IN | 170 | E | GA- | 1       | 3F     | N | 0  |
| IN | 178 | M | ATG | 3       | 3G     | I | 1  |
| IN | 189 | G | GGG | 1, 2, 3 | 3F, 3G | E | 1  |
| IN | 189 | G | GGG | 1, 2, 3 | 3F, 3G | K | 0  |
| IN | 190 | G | GGG | 1, 2, 3 | 3F, 3G | E | 1  |

|    |     |   |     |         |        |   |    |
|----|-----|---|-----|---------|--------|---|----|
| IN | 190 | G | GGG | 1, 2, 3 | 3F, 3G | K | 0  |
| IN | 190 | G | GGG | 1, 3    | 3G     | R | 2  |
| IN | 192 | G | GG- | 1       | 3F, 3G | E | 1  |
| IN | 192 | G | GG- | 1       | 3F, 3G | K | 0  |
| IN | 192 | G | GG- | 1       | 3G     | R | 0  |
| IN | 192 | G | GG- | 1       | 3G     | S | 0  |
| IN | 197 | G | GG- | 1       | 3F, 3G | E | 0  |
| IN | 197 | G | GG- | 1       | 3F, 3G | K | 0  |
| IN | 197 | G | GG- | 1       | 3G     | S | 0  |
| IN | 198 | E | GA- | 1       | 3F     | K | 2  |
| IN | 198 | E | GA- | 1       | 3F     | N | 0  |
| IN | 202 | D | GA- | 1       | 3F     | K | 0  |
| IN | 202 | D | GA- | 1       | 3F     | N | 0  |
| IN | 207 | D | GA- | 1       | 3F     | K | 0  |
| IN | 212 | E | GAA | 1       | 3F     | K | 5  |
| IN | 224 | R | CGG | 2, 3    | 3F, 3G | Q | 18 |
| IN | 229 | D | GAC | 1       | 3F     | K | 0  |
| IN | 232 | D | GA- | 1       | 3F     | K | 0  |
| IN | 235 | W | TGG | 2, 3    | 3F, 3G | * | 5  |
| IN | 237 | G | GGA | 1, 2    | 3F     | K | 0  |
| IN | 237 | G | GGA | 1       | 3G     | R | 0  |
| IN | 243 | W | TGG | 2, 3    | 3F, 3G | * | 2  |
| IN | 245 | G | GGT | 1       | 3F, 3G | E | 0  |
| IN | 245 | G | GGT | 1       | 3F, 3G | K | 0  |
| IN | 245 | G | GGT | 1       | 3G     | S | 0  |
| IN | 246 | E | GAA | 1       | 3F     | K | 3  |
| IN | 247 | G | GG- | 1       | 3F, 3G | E | 0  |
| IN | 247 | G | GG- | 1       | 3F, 3G | K | 1  |
| IN | 247 | G | GG- | 1       | 3G     | R | 4  |
| IN | 247 | G | GG- | 1       | 3G     | S | 0  |
| IN | 253 | D | GA- | 1       | 3F     | K | 0  |
| IN | 253 | D | GA- | 1       | 3F     | N | 3  |
| IN | 256 | D | GA- | 1       | 3F     | K | 1  |
| IN | 256 | D | GA- | 1       | 3F     | N | 0  |
| IN | 270 | D | GA- | 1       | 3F     | K | 0  |
| IN | 272 | G | GGA | 1, 2    | 3F     | E | 2  |
| IN | 272 | G | GGA | 1, 2    | 3F     | K | 1  |
| IN | 272 | G | GGA | 1       | 3G     | R | 9  |
| IN | 275 | M | ATG | 3       | 3G     | I | 0  |
| IN | 277 | G | GG- | 1       | 3F, 3G | E | 0  |
| IN | 277 | G | GG- | 1       | 3F, 3G | K | 0  |
| IN | 277 | G | GG- | 1       | 3G     | S | 1  |
| IN | 279 | D | GAT | 1       | 3F     | K | 0  |
| IN | 284 | R | -GA | 2       | 3F     | Q | 0  |
| IN | 287 | E | GA- | 1       | 3F     | K | 10 |
| IN | 287 | E | GA- | 1       | 3F     | N | 0  |

Supplementary Table 2. Estimated Proportion of APOBEC-Edited Sequences according to Number of Signature APOBEC-Associated Mutations

| Number of Signature<br>APOBEC-Associated<br>Mutations | Proportion, % |      |           |
|-------------------------------------------------------|---------------|------|-----------|
|                                                       | protease      | RT   | Integrase |
| 0                                                     | 0             | 0    | 0         |
| 1                                                     | 18            | 19   | 16        |
| 2                                                     | 86            | 79   | 76        |
| 3                                                     | 99.8          | 98.5 | 97.8      |
| >=4                                                   | 99.9          | 99.9 | 99.9      |

Local False Discovery Rate was used to estimate the rate for each number of APOBEC-associated mutations at which a sequence with that number of APOBEC-associated mutations did not arise from APOBEC-editing. The rates shown are the rates at which a sequence arose from APOBEC-editing.



Supplementary Table 3. Number of Sequences by Number of Very Rare Amino Acid Variants Occurring at a Prevalence <0.01%

| No. Rare Variants | Protease      |      | RT            |      | Integrase     |      |
|-------------------|---------------|------|---------------|------|---------------|------|
|                   | No. Sequences | %    | No. Sequences | %    | No. Sequences | %    |
| 0                 | 106496        | 96.5 | 106497        | 89.7 | 11073         | 93.5 |
| 1                 | 3338          | 3.0  | 9572          | 8.1  | 662           | 5.6  |
| 2                 | 352           | 0.3  | 1571          | 1.3  | 66            | 0.6  |
| 3                 | 95            | 0.1  | 501           | 0.4  | 11            | 0.1  |
| 4                 | 50            | 0.0  | 211           | 0.2  | 14            | 0.1  |
| 5                 | 31            | 0.0  | 103           | 0.1  | 5             | 0.0  |
| 6                 | 13            | 0.0  | 68            | 0.1  | 2             | 0.0  |
| 7                 | 12            | 0.0  | 36            | 0.0  | 1             | 0.0  |
| 8                 | 11            | 0.0  | 29            | 0.0  | 2             | 0.0  |
| 9                 | 3             | 0.0  | 24            | 0.0  | 2             | 0.0  |
| >=10              | 6             | 0.0  | 71            | 0.1  | 2             | 0.0  |

The proportion of sequences from plasma samples.

The highest number of very rare amino acid variants in a sequence was 10, 29 and 15 for protease, RT and integrase, respectively.
